# Supplementary material for: Inequalities and Duality in Gene Coexpression Networks of HIV‐1 Infection Revealed by the Combination of the Double‐Connectivity Approach and the Gini′s Method
Source: Hindawi journal article supplement (doi:10.1155/2011/926407), 2011-01-01
Supplement: f1 [file 926407.f1.pdf]

**Figure S1**

**Immune Activation**

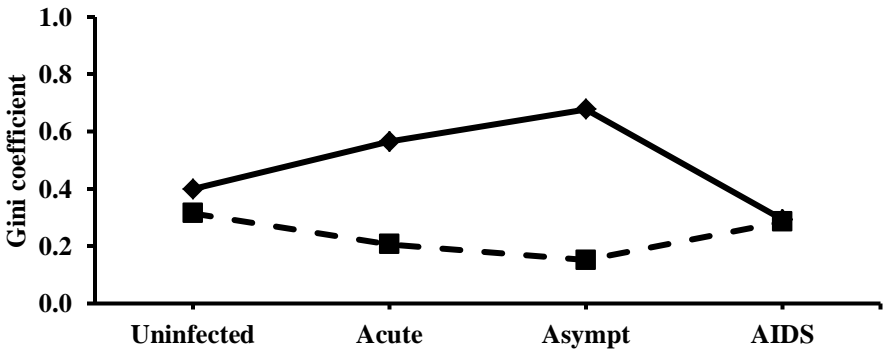

**Immune Defense**

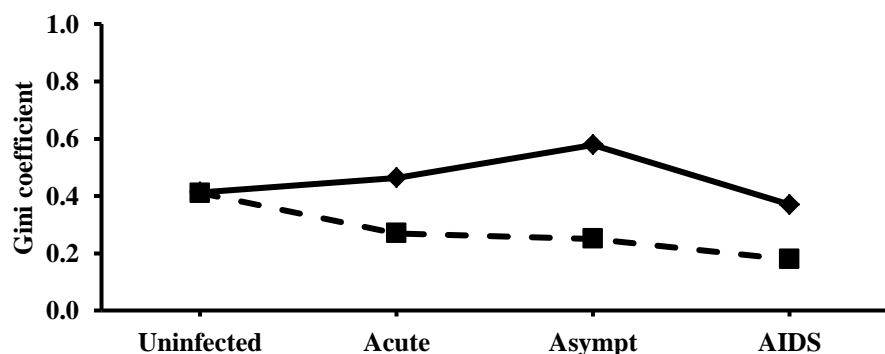

**B cell Proliferation, Differentiation**

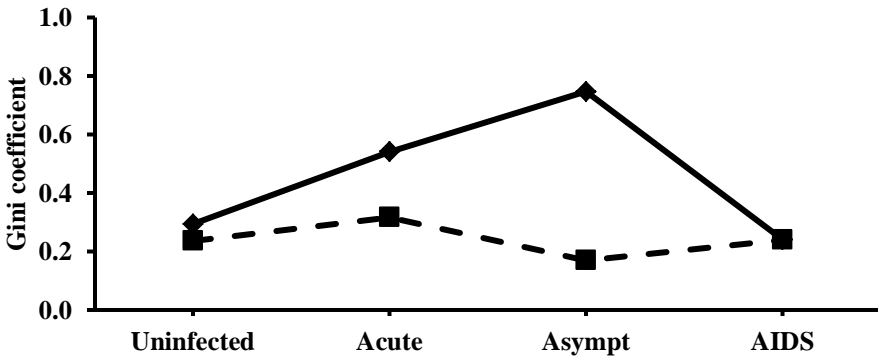

**Metabolism**

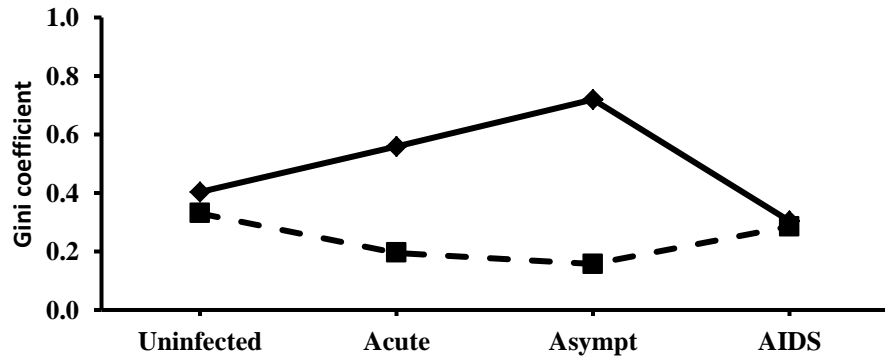

**Apoptosis**

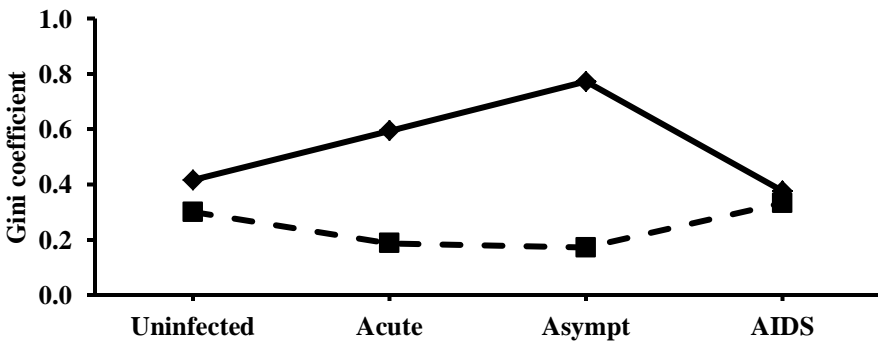

**Tissue Repair, Remodeling**

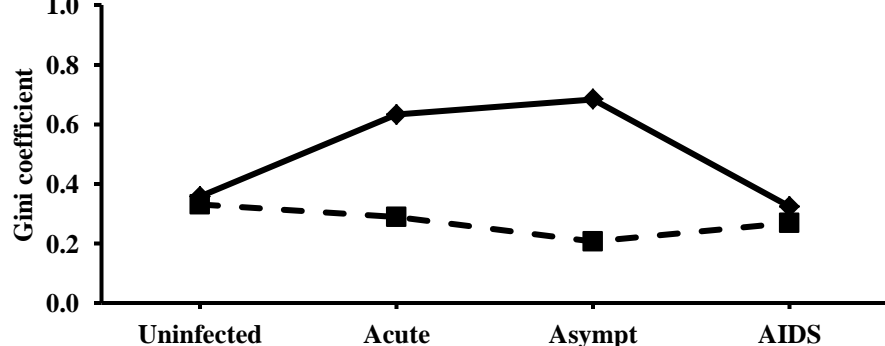

◆ Negative connectivity    ■ Positive connectivity

◆ Negative connectivity    ■ Positive connectivity
