# Supplementary material for: Inequalities and Duality in Gene Coexpression Networks of HIV‐1 Infection Revealed by the Combination of the Double‐Connectivity Approach and the Gini′s Method
Source: Hindawi journal article supplement (doi:10.1155/2011/926407), 2011-01-01
Supplement: f2 [file 926407.f2.pdf]

**Figure S2**

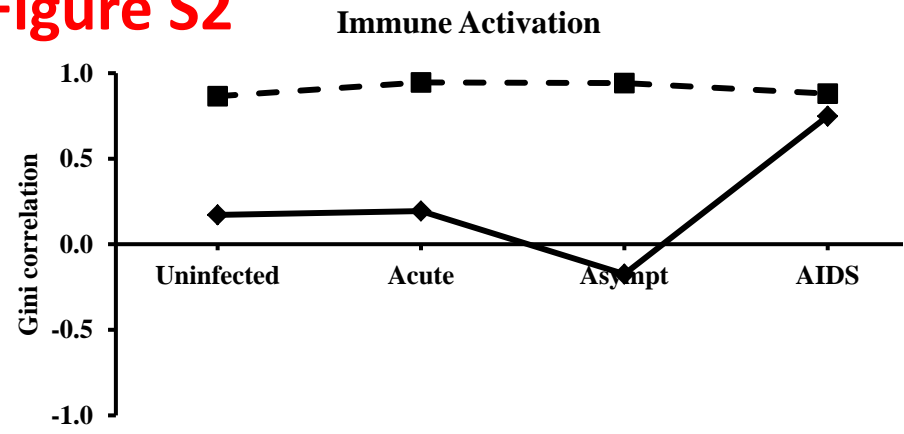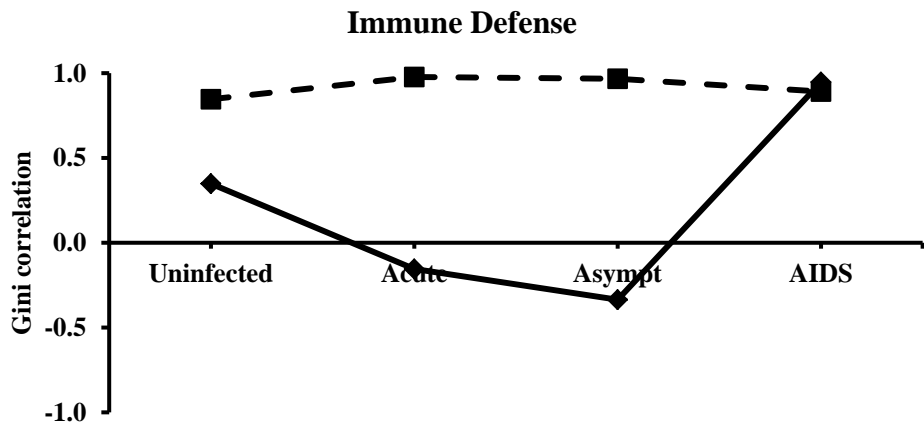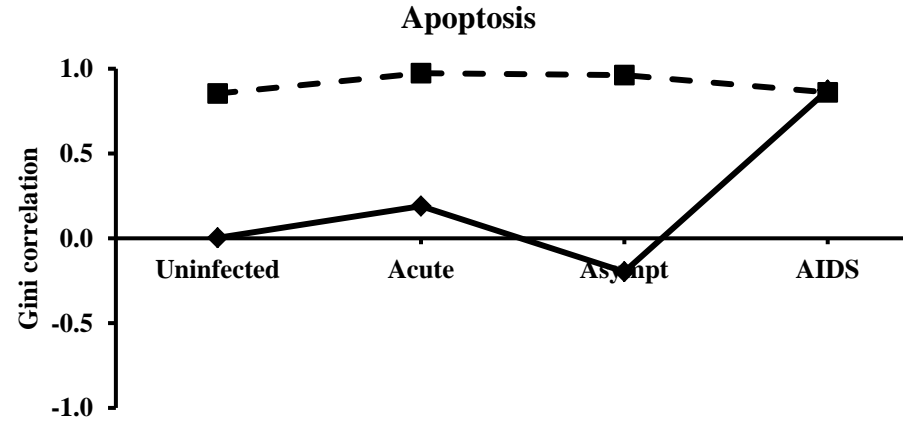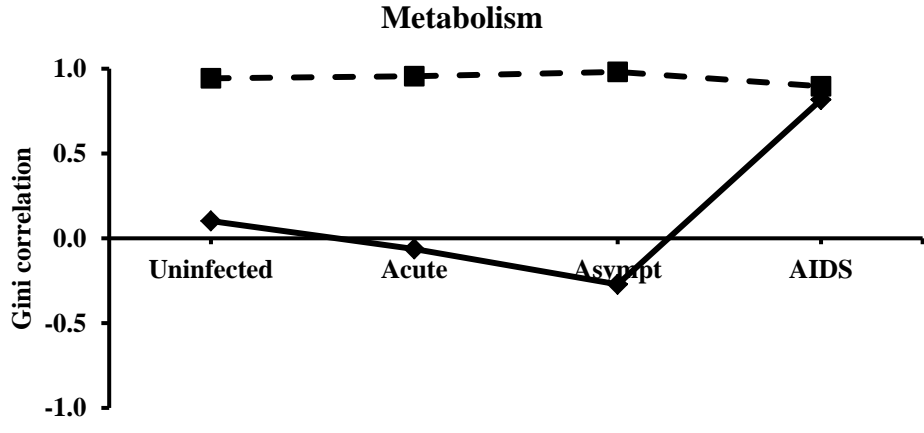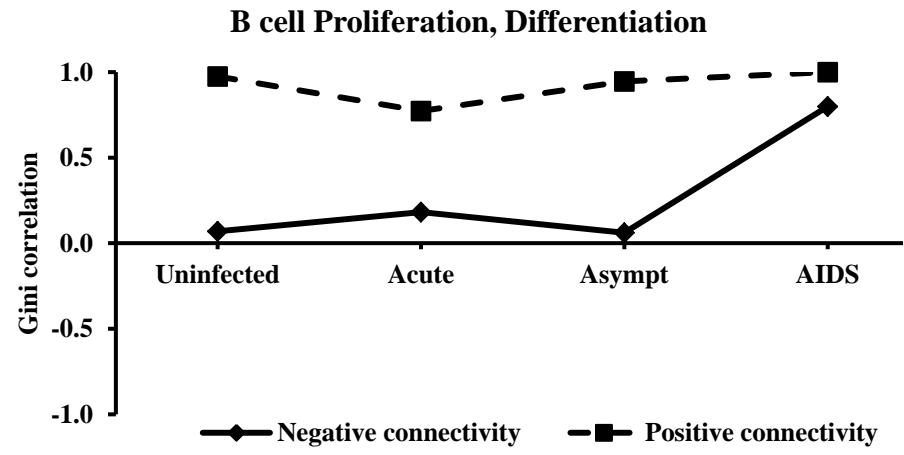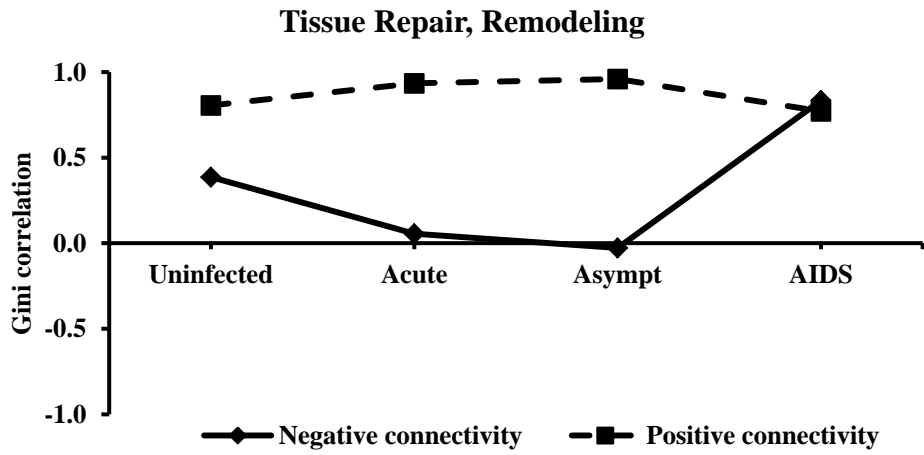

◆ Negative connectivity    ■ Positive connectivity

◆ Negative connectivity    ■ Positive connectivity
